# Supplementary material
Source: publisher site journal article supplement (https://www.dovepress.com/article/341332)
Supplement: Supplementary file 1 [file get_supplementary_file.php]

**Supplementary Table 1. Summary of Positive related gene correlated to PLODs in PAAD from TCGA database**

| <b>PLOD Protein Genes</b> | <b>Correlated Genes</b> | <b>Correlation Coefficient</b> | <b>P-Value</b> |
|---------------------------|-------------------------|--------------------------------|----------------|
| PLOD1                     | SERPINH1                | 0.756853328                    | 2.46E-34       |
| PLOD1                     | LGALS1                  | 0.740135424                    | 3.77E-32       |
| PLOD1                     | LOXL2                   | 0.731454472                    | 4.43E-31       |
| PLOD1                     | CD276                   | 0.730869588                    | 5.21E-31       |
| PLOD1                     | ENO1                    | 0.710445436                    | 1.18E-28       |
| PLOD1                     | FKBP10                  | 0.70693988                     | 2.85E-28       |
| PLOD1                     | MMP14                   | 0.703519295                    | 6.65E-28       |
| PLOD1                     | LEPRE1                  | 0.698456168                    | 2.29E-27       |
| PLOD1                     | ITGA5                   | 0.686631895                    | 3.71E-26       |
| PLOD1                     | BMP1                    | 0.680869623                    | 1.38E-25       |
| PLOD1                     | RCN3                    | 0.67532425                     | 4.73E-25       |
| PLOD1                     | ARSI                    | 0.674491169                    | 5.67E-25       |
| PLOD1                     | GLT25D1                 | 0.673553718                    | 6.97E-25       |
| PLOD1                     | TMEM158                 | 0.669286315                    | 1.76E-24       |
| PLOD1                     | FN1                     | 0.660522771                    | 1.12E-23       |
| PLOD1                     | ITGB5                   | 0.659831959                    | 1.29E-23       |
| PLOD1                     | COL5A1                  | 0.658248797                    | 1.79E-23       |
| PLOD1                     | CALU                    | 0.654831465                    | 3.60E-23       |
| PLOD1                     | MXRA8                   | 0.653915087                    | 4.34E-23       |
| PLOD1                     | C1QTNF6                 | 0.653118199                    | 5.09E-23       |
| PLOD1                     | LOXL3                   | 0.65246642                     | 5.81E-23       |
| PLOD1                     | MRC2                    | 0.643744645                    | 3.27E-22       |
| PLOD1                     | COL1A2                  | 0.642063864                    | 4.54E-22       |
| PLOD1                     | P4HA1                   | 0.6412932                      | 5.27E-22       |
| PLOD1                     | COL1A1                  | 0.641123442                    | 5.44E-22       |
| PLOD1                     | PTK7                    | 0.640562137                    | 6.06E-22       |
| PLOD1                     | MFAP2                   | 0.639988758                    | 6.77E-22       |
| PLOD1                     | COL5A3                  | 0.638125552                    | 9.68E-22       |
| PLOD1                     | PPAPDC1A                | 0.637827692                    | 1.02E-21       |
| PLOD1                     | PLOD2                   | 0.636779824                    | 1.25E-21       |
| PLOD1                     | TUBB                    | 0.636204092                    | 1.40E-21       |
| PLOD1                     | EFEMP2                  | 0.635563682                    | 1.58E-21       |
| PLOD1                     | PLAU                    | 0.633554361                    | 2.30E-21       |
| PLOD1                     | ANGPTL2                 | 0.630613853                    | 3.98E-21       |
| PLOD1                     | TWIST1                  | 0.630072836                    | 4.41E-21       |
| PLOD1                     | COL6A1                  | 0.628630535                    | 5.75E-21       |

|       |          |             |          |
|-------|----------|-------------|----------|
| PLOD1 | P4HA3    | 0.628030652 | 6.42E-21 |
| PLOD1 | SRPX2    | 0.622808475 | 1.66E-20 |
| PLOD1 | C3orf21  | 0.620789702 | 2.39E-20 |
| PLOD1 | AEBP1    | 0.617264501 | 4.49E-20 |
| PLOD1 | TMEM45A  | 0.615751252 | 5.86E-20 |
| PLOD1 | GUCA1A   | 0.615141027 | 6.53E-20 |
| PLOD1 | EMP3     | 0.614939923 | 6.76E-20 |
| PLOD1 | COL3A1   | 0.613224794 | 9.13E-20 |
| PLOD1 | PCOLCE   | 0.610729925 | 1.41E-19 |
| PLOD1 | PXDN     | 0.609263773 | 1.81E-19 |
| PLOD1 | CERCAM   | 0.608067713 | 2.23E-19 |
| PLOD1 | CMTM3    | 0.607794773 | 2.33E-19 |
| PLOD1 | PODNL1   | 0.606459968 | 2.93E-19 |
| PLOD1 | FAP      | 0.604847033 | 3.86E-19 |
| PLOD1 | RPSAP52  | 0.602410657 | 5.82E-19 |
| PLOD1 | ADAMTS7  | 0.602046641 | 6.19E-19 |
| PLOD1 | SNAI2    | 0.601621259 | 6.64E-19 |
| PLOD1 | COL5A2   | 0.601475762 | 6.81E-19 |
| PLOD1 | C9orf109 | 0.600946281 | 7.44E-19 |
| PLOD1 | COL6A3   | 0.600672134 | 7.79E-19 |
| PLOD2 | LOX      | 0.812909546 | 1.00E-43 |
| PLOD2 | FN1      | 0.785621013 | 3.51E-43 |
| PLOD2 | FNDC3B   | 0.771030419 | 1.53E-38 |
| PLOD2 | FRMD6    | 0.765718601 | 2.48E-36 |
| PLOD2 | COL6A3   | 0.761418758 | 1.44E-35 |
| PLOD2 | COL5A2   | 0.757242953 | 5.80E-35 |
| PLOD2 | ADAMTS12 | 0.753676899 | 2.18E-34 |
| PLOD2 | PXDN     | 0.753222399 | 6.60E-34 |
| PLOD2 | RAI14    | 0.749922606 | 7.59E-34 |
| PLOD2 | COL3A1   | 0.747023584 | 2.08E-33 |
| PLOD2 | ZNF532   | 0.744135199 | 4.97E-33 |
| PLOD2 | COL5A1   | 0.739446712 | 1.17E-32 |
| PLOD2 | COL1A2   | 0.739162309 | 4.60E-32 |
| PLOD2 | VCAN     | 0.738486898 | 4.99E-32 |
| PLOD2 | NID2     | 0.737638569 | 6.06E-32 |
| PLOD2 | EDNRA    | 0.732217892 | 7.73E-32 |
| PLOD2 | SPARC    | 0.731888515 | 3.58E-31 |
| PLOD2 | LOXL2    | 0.731082908 | 3.92E-31 |
| PLOD2 | VGLL3    | 0.730900316 | 4.91E-31 |
| PLOD2 | ADAM12   | 0.730123101 | 5.16E-31 |
| PLOD2 | ITGA5    | 0.729133326 | 6.40E-31 |
| PLOD2 | ANTXR1   | 0.728440228 | 8.41E-31 |
| PLOD2 | FSTL1    | 0.727890481 | 1.02E-30 |
| PLOD2 | TNFAIP6  | 0.723684927 | 1.18E-30 |

|       |            |             |          |
|-------|------------|-------------|----------|
| PLOD2 | SPOCK1     | 0.722818031 | 3.70E-30 |
| PLOD2 | LOXL3      | 0.722490822 | 4.67E-30 |
| PLOD2 | COL4A1     | 0.722224163 | 5.10E-30 |
| PLOD2 | COL8A1     | 0.720340106 | 5.48E-30 |
| PLOD2 | WISP1      | 0.719063375 | 9.04E-30 |
| PLOD2 | CLIC4      | 0.71562536  | 1.27E-29 |
| PLOD2 | SULF1      | 0.712796265 | 3.11E-29 |
| PLOD2 | MTMR2      | 0.711658101 | 6.46E-29 |
| PLOD2 | FAP        | 0.709099234 | 8.64E-29 |
| PLOD2 | INHBA      | 0.708946068 | 1.65E-28 |
| PLOD2 | CHSY1      | 0.708859625 | 1.72E-28 |
| PLOD2 | COL12A1    | 0.708838121 | 1.76E-28 |
| PLOD2 | CALU       | 0.707124102 | 1.77E-28 |
| PLOD2 | SNAI2      | 0.706734877 | 2.72E-28 |
| PLOD2 | IKBIP      | 0.706187235 | 3.00E-28 |
| PLOD2 | ITGB1      | 0.705894434 | 3.43E-28 |
| PLOD2 | PRRX1      | 0.704193953 | 3.69E-28 |
| PLOD2 | POSTN      | 0.702960135 | 5.63E-28 |
| PLOD2 | PRSS23     | 0.701088396 | 7.64E-28 |
| PLOD2 | FBN1       | 0.699336123 | 1.21E-27 |
| PLOD2 | PDGFRB     | 0.69872116  | 1.85E-27 |
| PLOD2 | COL1A1     | 0.69724188  | 2.15E-27 |
| PLOD2 | MAP4K5     | 0.695619277 | 3.07E-27 |
| PLOD2 | GPR176     | 0.695140503 | 4.52E-27 |
| PLOD2 | RAB31      | 0.695139669 | 5.07E-27 |
| PLOD2 | NTM        | 0.690687649 | 5.07E-27 |
| PLOD2 | LAMA4      | 0.68984184  | 1.45E-26 |
| PLOD2 | HMCN1      | 0.689452787 | 1.77E-26 |
| PLOD2 | PDGFC      | 0.688910029 | 1.93E-26 |
| PLOD2 | TMEFF1     | 0.688844437 | 2.19E-26 |
| PLOD2 | PLS3       | 0.68818469  | 2.23E-26 |
| PLOD2 | FKBP14     | 0.686705646 | 2.59E-26 |
| PLOD2 | SEC23A     | 0.685448691 | 3.65E-26 |
| PLOD2 | GPX8       | 0.684833316 | 4.87E-26 |
| PLOD2 | OSMR       | 0.684295577 | 5.61E-26 |
| PLOD2 | THBS2      | 0.682245253 | 6.34E-26 |
| PLOD2 | CDH11      | 0.682186544 | 1.01E-25 |
| PLOD2 | TMEM45A    | 0.681929392 | 1.02E-25 |
| PLOD2 | TNFSF4     | 0.681843668 | 1.08E-25 |
| PLOD2 | LTBP1      | 0.681794258 | 1.11E-25 |
| PLOD2 | CHSY3      | 0.680158534 | 1.12E-25 |
| PLOD2 | ATXN1      | 0.679982816 | 1.62E-25 |
| PLOD2 | CSGALNACT2 | 0.678891806 | 1.68E-25 |
| PLOD2 | GBE1       | 0.678382593 | 2.14E-25 |

|       |          |             |          |
|-------|----------|-------------|----------|
| PLOD2 | MRC2     | 0.676880249 | 2.40E-25 |
| PLOD2 | COL4A2   | 0.674625435 | 3.35E-25 |
| PLOD2 | ADAMTS2  | 0.674590566 | 5.51E-25 |
| PLOD2 | ITGA11   | 0.672993786 | 5.55E-25 |
| PLOD2 | NID1     | 0.672678493 | 7.87E-25 |
| PLOD2 | BNC2     | 0.671979726 | 8.43E-25 |
| PLOD2 | PRR16    | 0.67136531  | 9.81E-25 |
| PLOD2 | GJA1     | 0.669975567 | 1.12E-24 |
| PLOD2 | KIRREL   | 0.668934671 | 1.51E-24 |
| PLOD2 | RBMS1    | 0.6683976   | 1.89E-24 |
| PLOD2 | ITGAV    | 0.666131373 | 2.12E-24 |
| PLOD2 | PCDH7    | 0.664861191 | 3.44E-24 |
| PLOD2 | PABPC4L  | 0.664548554 | 4.51E-24 |
| PLOD2 | PANX1    | 0.663973072 | 4.81E-24 |
| PLOD2 | P4HA3    | 0.663426887 | 5.43E-24 |
| PLOD2 | ADAM19   | 0.663238946 | 6.10E-24 |
| PLOD2 | LUM      | 0.662574982 | 6.34E-24 |
| PLOD2 | CEP170   | 0.662470904 | 7.29E-24 |
| PLOD2 | ARL4C    | 0.662173369 | 7.45E-24 |
| PLOD2 | GXYLT2   | 0.662102311 | 7.93E-24 |
| PLOD2 | SSH1     | 0.661207299 | 8.05E-24 |
| PLOD2 | CALD1    | 0.659525378 | 9.70E-24 |
| PLOD2 | MMP14    | 0.659384946 | 1.37E-23 |
| PLOD2 | KCND2    | 0.658929914 | 1.42E-23 |
| PLOD2 | CNN3     | 0.658924978 | 1.55E-23 |
| PLOD2 | PICALM   | 0.65738596  | 1.56E-23 |
| PLOD2 | CERCAM   | 0.656366989 | 2.14E-23 |
| PLOD2 | SERPINH1 | 0.655296362 | 2.63E-23 |
| PLOD2 | RASSF8   | 0.654878557 | 3.28E-23 |
| PLOD2 | SRPX2    | 0.654865027 | 3.57E-23 |
| PLOD2 | ENPEP    | 0.6537821   | 3.58E-23 |
| PLOD2 | TWIST1   | 0.653548752 | 4.45E-23 |
| PLOD2 | FNDC1    | 0.65323195  | 4.67E-23 |
| PLOD2 | RECQL    | 0.6531575   | 4.98E-23 |
| PLOD2 | PPFIBP1  | 0.653152431 | 5.05E-23 |
| PLOD2 | KDELC1   | 0.65301018  | 5.06E-23 |
| PLOD2 | CD109    | 0.652791838 | 5.21E-23 |
| PLOD2 | LTBP2    | 0.652681869 | 5.44E-23 |
| PLOD2 | EFEMP2   | 0.651832507 | 5.56E-23 |
| PLOD2 | THBS1    | 0.65107682  | 6.60E-23 |
| PLOD2 | PLXDC2   | 0.650463706 | 7.68E-23 |
| PLOD2 | SH3GLB1  | 0.650054818 | 8.68E-23 |
| PLOD2 | AXL      | 0.649948752 | 9.42E-23 |
| PLOD2 | TIMP3    | 0.649381813 | 9.62E-23 |

|       |         |             |          |
|-------|---------|-------------|----------|
| PLOD2 | MAF     | 0.648221079 | 1.08E-22 |
| PLOD2 | LIMS1   | 0.648065856 | 1.36E-22 |
| PLOD2 | PLAU    | 0.646974538 | 1.40E-22 |
| PLOD2 | GLI3    | 0.646936235 | 1.74E-22 |
| PLOD2 | ASAM    | 0.646455353 | 1.75E-22 |
| PLOD2 | P4HA1   | 0.646446833 | 1.92E-22 |
| PLOD2 | CTSK    | 0.646404902 | 1.93E-22 |
| PLOD2 | NOX4    | 0.646303709 | 1.94E-22 |
| PLOD2 | GFPT2   | 0.646282212 | 1.98E-22 |
| PLOD2 | IL1RAP  | 0.646144718 | 1.99E-22 |
| PLOD2 | QKI     | 0.645993127 | 2.05E-22 |
| PLOD2 | SLC2A3  | 0.645284023 | 2.11E-22 |
| PLOD2 | LAMC1   | 0.644602701 | 2.42E-22 |
| PLOD2 | ADAMTS5 | 0.644283242 | 2.77E-22 |
| PLOD2 | CTHRC1  | 0.643367714 | 2.95E-22 |
| PLOD2 | BASP1   | 0.642260241 | 3.52E-22 |
| PLOD2 | PDLIM3  | 0.641988755 | 4.37E-22 |
| PLOD2 | KANK4   | 0.641028979 | 4.60E-22 |
| PLOD2 | SEPT11  | 0.64051633  | 5.54E-22 |
| PLOD2 | WWTR1   | 0.639616665 | 6.12E-22 |
| PLOD2 | HIF1A   | 0.638384111 | 7.27E-22 |
| PLOD2 | GAS1    | 0.637455069 | 9.21E-22 |
| PLOD2 | SLC2A14 | 0.637227846 | 1.10E-21 |
| PLOD2 | FAM26E  | 0.636952816 | 1.15E-21 |
| PLOD2 | PLOD1   | 0.636779824 | 1.21E-21 |
| PLOD2 | MSN     | 0.636564529 | 1.25E-21 |
| PLOD2 | COMMD2  | 0.635690246 | 1.30E-21 |
| PLOD2 | UNC5B   | 0.635648025 | 1.54E-21 |
| PLOD2 | C5orf13 | 0.635516093 | 1.55E-21 |
| PLOD2 | BICC1   | 0.635432171 | 1.59E-21 |
| PLOD2 | DDR2    | 0.634449852 | 1.61E-21 |
| PLOD2 | CXCR7   | 0.634154842 | 1.94E-21 |
| PLOD2 | MEX3B   | 0.634122512 | 2.05E-21 |
| PLOD2 | PTRF    | 0.633438851 | 2.07E-21 |
| PLOD2 | ELK3    | 0.632584996 | 2.35E-21 |
| PLOD2 | DNAJB4  | 0.6322255   | 2.76E-21 |
| PLOD2 | ODZ3    | 0.632206703 | 2.95E-21 |
| PLOD2 | AEBP1   | 0.631547867 | 2.96E-21 |
| PLOD2 | COL11A1 | 0.630990632 | 3.35E-21 |
| PLOD2 | ITPRIP  | 0.630101488 | 3.71E-21 |
| PLOD2 | FUT11   | 0.629894841 | 4.38E-21 |
| PLOD2 | FERMT2  | 0.629223813 | 4.55E-21 |
| PLOD2 | PAPPA   | 0.628844485 | 5.16E-21 |
| PLOD2 | ANGPTL2 | 0.628232144 | 5.53E-21 |

|       |          |             |          |
|-------|----------|-------------|----------|
| PLOD2 | SSPN     | 0.627471181 | 6.19E-21 |
| PLOD2 | INSIG2   | 0.62730785  | 7.12E-21 |
| PLOD2 | ADAM17   | 0.62691188  | 7.34E-21 |
| PLOD2 | SERPINE1 | 0.626760463 | 7.89E-21 |
| PLOD2 | LRP12    | 0.626623324 | 8.11E-21 |
| PLOD2 | PDLIM5   | 0.626599565 | 8.32E-21 |
| PLOD2 | KAL1     | 0.625731076 | 8.36E-21 |
| PLOD2 | PIK3CA   | 0.624974889 | 9.79E-21 |
| PLOD2 | MMP2     | 0.624774903 | 1.12E-20 |
| PLOD2 | KDELC2   | 0.624478019 | 1.17E-20 |
| PLOD2 | PALLD    | 0.624471903 | 1.23E-20 |
| PLOD2 | C9orf110 | 0.624366583 | 1.23E-20 |
| PLOD2 | COL8A2   | 0.624276192 | 1.26E-20 |
| PLOD2 | STC1     | 0.62408813  | 1.28E-20 |
| PLOD2 | ST6GAL2  | 0.623099088 | 1.32E-20 |
| PLOD2 | THY1     | 0.621148273 | 1.58E-20 |
| PLOD2 | CMTM3    | 0.620909588 | 2.25E-20 |
| PLOD2 | SEMA3C   | 0.619332721 | 2.34E-20 |
| PLOD2 | SOCS5    | 0.619156486 | 3.11E-20 |
| PLOD2 | WWC2     | 0.618539957 | 3.21E-20 |
| PLOD2 | LPAR4    | 0.618204008 | 3.58E-20 |
| PLOD2 | F2R      | 0.617798888 | 3.80E-20 |
| PLOD2 | PTK7     | 0.617632796 | 4.08E-20 |
| PLOD2 | KLHL5    | 0.61762843  | 4.20E-20 |
| PLOD2 | TSHZ3    | 0.616340332 | 4.21E-20 |
| PLOD2 | COL10A1  | 0.616137514 | 5.28E-20 |
| PLOD2 | DCBLD2   | 0.615035697 | 5.48E-20 |
| PLOD2 | COL6A1   | 0.614990114 | 6.65E-20 |
| PLOD2 | MXRA5    | 0.614758774 | 6.70E-20 |
| PLOD2 | UBE2E2   | 0.614609342 | 6.98E-20 |
| PLOD2 | HIVEP2   | 0.61454882  | 7.17E-20 |
| PLOD2 | UNC5C    | 0.614253201 | 7.24E-20 |
| PLOD2 | GDF6     | 0.613796054 | 7.63E-20 |
| PLOD2 | FZD1     | 0.613395645 | 8.26E-20 |
| PLOD2 | TMEM43   | 0.613267209 | 8.86E-20 |
| PLOD2 | SAV1     | 0.612967785 | 9.06E-20 |
| PLOD2 | C10orf72 | 0.612602752 | 9.55E-20 |
| PLOD2 | CD248    | 0.612146992 | 1.02E-19 |
| PLOD2 | NOTCH3   | 0.61179149  | 1.10E-19 |
| PLOD2 | MSRB3    | 0.611762364 | 1.17E-19 |
| PLOD2 | PRDM1    | 0.611206626 | 1.18E-19 |
| PLOD2 | B3GALTL  | 0.610053408 | 1.30E-19 |
| PLOD2 | PPAPDC1A | 0.609738865 | 1.58E-19 |
| PLOD2 | GNAI3    | 0.609209085 | 1.67E-19 |

|       |          |             |          |
|-------|----------|-------------|----------|
| PLOD2 | FLNA     | 0.608913146 | 1.83E-19 |
| PLOD2 | DIO2     | 0.608844738 | 1.93E-19 |
| PLOD2 | KLF7     | 0.608807343 | 1.95E-19 |
| PLOD2 | CLDND1   | 0.608794461 | 1.96E-19 |
| PLOD2 | GLT8D2   | 0.608776709 | 1.97E-19 |
| PLOD2 | DPYD     | 0.6085664   | 1.97E-19 |
| PLOD2 | FKBP7    | 0.607669103 | 2.05E-19 |
| PLOD2 | FIBIN    | 0.607091953 | 2.39E-19 |
| PLOD2 | DPYSL3   | 0.607089752 | 2.63E-19 |
| PLOD2 | BGN      | 0.606813617 | 2.63E-19 |
| PLOD2 | ITGA1    | 0.606701371 | 2.76E-19 |
| PLOD2 | ITGB3    | 0.606348457 | 2.81E-19 |
| PLOD2 | RAB23    | 0.606285363 | 2.99E-19 |
| PLOD2 | HTRA1    | 0.6061651   | 3.02E-19 |
| PLOD2 | SFRP2    | 0.606022293 | 3.08E-19 |
| PLOD2 | PARD6G   | 0.605388829 | 3.16E-19 |
| PLOD2 | FAM198B  | 0.605064775 | 3.52E-19 |
| PLOD2 | ZEB2     | 0.604895471 | 3.72E-19 |
| PLOD2 | SH3PXD2B | 0.604701091 | 3.83E-19 |
| PLOD2 | TMEM200A | 0.60468671  | 3.95E-19 |
| PLOD2 | BNIP3L   | 0.604587315 | 3.96E-19 |
| PLOD2 | CDK14    | 0.604564786 | 4.03E-19 |
| PLOD2 | ASAP1    | 0.60418857  | 4.05E-19 |
| PLOD2 | RASAL2   | 0.60388313  | 4.31E-19 |
| PLOD2 | YEATS2   | 0.603778387 | 4.54E-19 |
| PLOD2 | RRAGC    | 0.603612608 | 4.62E-19 |
| PLOD2 | NUAK1    | 0.602923605 | 4.75E-19 |
| PLOD2 | STON1    | 0.602886024 | 5.34E-19 |
| PLOD2 | ZFHX4    | 0.602820424 | 5.37E-19 |
| PLOD2 | TSC22D2  | 0.601478834 | 5.43E-19 |
| PLOD2 | LATS2    | 0.601392076 | 6.80E-19 |
| PLOD2 | NRP1     | 0.600888746 | 6.90E-19 |
| PLOD2 | SPSB1    | 0.600832786 | 7.51E-19 |
| PLOD2 | ZFPM2    | 0.600038716 | 7.58E-19 |
| PLOD3 | GNB2     | 0.603216559 | 5.08E-19 |
| PLOD3 | CTSA     | 0.598607357 | 1.10E-18 |
| PLOD3 | CALR     | 0.586921361 | 7.33E-18 |
| PLOD3 | PDIA4    | 0.584484132 | 1.08E-17 |
| PLOD3 | TAF6     | 0.576300419 | 3.86E-17 |
| PLOD3 | AP1S1    | 0.575507318 | 4.36E-17 |
| PLOD3 | C20orf20 | 0.55985537  | 4.50E-16 |
| PLOD3 | CHPF2    | 0.558159567 | 5.75E-16 |
| PLOD3 | PIGT     | 0.558154447 | 5.76E-16 |
| PLOD3 | POP7     | 0.554151062 | 1.02E-15 |



|       |          |             |          |
|-------|----------|-------------|----------|
| PLOD3 | ARF1     | 0.55296286  | 1.21E-15 |
| PLOD3 | KDELR1   | 0.551074107 | 1.58E-15 |
| PLOD3 | ZNHIT1   | 0.539190997 | 8.18E-15 |
| PLOD3 | TMED9    | 0.538480296 | 9.00E-15 |
| PLOD3 | KDELR2   | 0.529510367 | 2.98E-14 |
| PLOD3 | CARM1    | 0.528794296 | 3.27E-14 |
| PLOD3 | TBRG4    | 0.528731921 | 3.30E-14 |
| PLOD3 | SLC35A2  | 0.523329107 | 6.65E-14 |
| PLOD3 | MOSPD3   | 0.520759619 | 9.24E-14 |
| PLOD3 | ERGIC3   | 0.519163644 | 1.13E-13 |
| PLOD3 | DPP9     | 0.517291973 | 1.43E-13 |
| PLOD3 | DLGAP4   | 0.516642043 | 1.56E-13 |
| PLOD3 | FAM189B  | 0.513953512 | 2.18E-13 |
| PLOD3 | C19orf10 | 0.513188344 | 2.40E-13 |
| PLOD3 | MOGS     | 0.511733081 | 2.87E-13 |
| PLOD3 | PTCD1    | 0.510492534 | 3.35E-13 |
| PLOD3 | GPR172A  | 0.509800746 | 3.65E-13 |
| PLOD3 | TMEM189  | 0.509546559 | 3.77E-13 |
| PLOD3 | REEP4    | 0.508879084 | 4.09E-13 |
| PLOD3 | LGALS3BP | 0.508071043 | 4.51E-13 |
| PLOD3 | YKT6     | 0.506340306 | 5.57E-13 |
| PLOD3 | UBE2S    | 0.504375891 | 7.07E-13 |
| PLOD3 | MDH2     | 0.503323662 | 8.03E-13 |
| PLOD3 | PDAP1    | 0.501884065 | 9.55E-13 |
| PLOD3 | EIF6     | 0.501771089 | 9.68E-13 |

\*Only genes with correlation coefficient > 0.5 are listed.

Supplementary Table 2. Summary of Negative related gene correlated to PLODs in PAAD from TCGA database

| PLOD Protein | Correlated | Correlation  | P-Value  |
|--------------|------------|--------------|----------|
| Genes        | Genes      | Coefficient  |          |
| PLOD1        | RALGPS1    | -0.685981573 | 4.31E-26 |
| PLOD1        | ATP8A1     | -0.631276127 | 3.52E-21 |
| PLOD1        | ZNF620     | -0.623646089 | 1.43E-20 |
| PLOD1        | ATP2A3     | -0.605410221 | 3.51E-19 |
| PLOD1        | C2orf15    | -0.602259817 | 5.97E-19 |
| PLOD1        | C12orf27   | -0.59910186  | 1.01E-18 |
| PLOD1        | PHOSPHO2   | -0.581964452 | 1.60E-17 |
| PLOD1        | LRRC16B    | -0.56833432  | 1.29E-16 |
| PLOD1        | TTLL6      | -0.565080405 | 2.09E-16 |
| PLOD1        | BTNL9      | -0.563438865 | 2.67E-16 |

|       |           |              |          |
|-------|-----------|--------------|----------|
| PLOD1 | PTPRN2    | -0.562849369 | 2.91E-16 |
| PLOD1 | ZNF33A    | -0.56168864  | 3.44E-16 |
| PLOD1 | VIPR1     | -0.561433865 | 3.58E-16 |
| PLOD1 | LOC400027 | -0.556415535 | 7.39E-16 |
| PLOD1 | PIP5K1B   | -0.552666048 | 1.26E-15 |
| PLOD1 | CNNM3     | -0.544590117 | 3.91E-15 |
| PLOD1 | SEPSECS   | -0.541940276 | 5.62E-15 |
| PLOD1 | ZNF44     | -0.541370368 | 6.08E-15 |
| PLOD1 | TPD52     | -0.54127754  | 6.16E-15 |
| PLOD1 | C11orf92  | -0.540370443 | 6.97E-15 |
| PLOD1 | PNPLA7    | -0.538814517 | 8.61E-15 |
| PLOD1 | ANKRD43   | -0.538702711 | 8.74E-15 |
| PLOD1 | RALGAPA1  | -0.537418615 | 1.04E-14 |
| PLOD1 | SLAIN1    | -0.536376621 | 1.20E-14 |
| PLOD1 | ZNF708    | -0.534433261 | 1.55E-14 |
| PLOD1 | PPP1R9A   | -0.532675826 | 1.96E-14 |
| PLOD1 | TSPAN12   | -0.53250738  | 2.00E-14 |
| PLOD1 | EPHA10    | -0.530165079 | 2.73E-14 |
| PLOD1 | EXOC6     | -0.530007055 | 2.79E-14 |
| PLOD1 | ZNF564    | -0.527900764 | 3.67E-14 |
| PLOD1 | RUNDC1    | -0.527853992 | 3.70E-14 |
| PLOD1 | ZNF91     | -0.527072687 | 4.09E-14 |
| PLOD1 | CCDC125   | -0.526596833 | 4.36E-14 |
| PLOD1 | DDC       | -0.526092619 | 4.65E-14 |
| PLOD1 | MTMR10    | -0.525764633 | 4.85E-14 |
| PLOD1 | C10orf108 | -0.525661928 | 4.92E-14 |
| PLOD1 | BEND7     | -0.525655379 | 4.92E-14 |
| PLOD1 | DGKE      | -0.52424809  | 5.90E-14 |
| PLOD1 | CA8       | -0.524104855 | 6.01E-14 |
| PLOD1 | RALGPS1   | -0.685981573 | 4.31E-26 |
| PLOD1 | ATP8A1    | -0.631276127 | 3.52E-21 |
| PLOD1 | ZNF620    | -0.623646089 | 1.43E-20 |
| PLOD1 | ATP2A3    | -0.605410221 | 3.51E-19 |
| PLOD1 | C2orf15   | -0.602259817 | 5.97E-19 |
| PLOD1 | C12orf27  | -0.59910186  | 1.01E-18 |
| PLOD1 | PHOSPHO2  | -0.581964452 | 1.60E-17 |
| PLOD1 | LRRC16B   | -0.56833432  | 1.29E-16 |
| PLOD1 | TTL6      | -0.565080405 | 2.09E-16 |
| PLOD1 | BTNL9     | -0.563438865 | 2.67E-16 |
| PLOD1 | PTPRN2    | -0.562849369 | 2.91E-16 |
| PLOD1 | ZNF33A    | -0.56168864  | 3.44E-16 |
| PLOD1 | VIPR1     | -0.561433865 | 3.58E-16 |
| PLOD1 | LOC400027 | -0.556415535 | 7.39E-16 |
| PLOD1 | PIP5K1B   | -0.552666048 | 1.26E-15 |

|       |           |              |          |
|-------|-----------|--------------|----------|
| PLOD1 | CNNM3     | -0.544590117 | 3.91E-15 |
| PLOD1 | SEPSECS   | -0.541940276 | 5.62E-15 |
| PLOD1 | ZNF44     | -0.541370368 | 6.08E-15 |
| PLOD1 | TPD52     | -0.54127754  | 6.16E-15 |
| PLOD1 | C11orf92  | -0.540370443 | 6.97E-15 |
| PLOD1 | PNPLA7    | -0.538814517 | 8.61E-15 |
| PLOD1 | ANKRD43   | -0.538702711 | 8.74E-15 |
| PLOD1 | RALGAPA1  | -0.537418615 | 1.04E-14 |
| PLOD1 | SLAIN1    | -0.536376621 | 1.20E-14 |
| PLOD1 | ZNF708    | -0.534433261 | 1.55E-14 |
| PLOD1 | PPP1R9A   | -0.532675826 | 1.96E-14 |
| PLOD1 | TSPAN12   | -0.53250738  | 2.00E-14 |
| PLOD1 | EPHA10    | -0.530165079 | 2.73E-14 |
| PLOD1 | EXOC6     | -0.530007055 | 2.79E-14 |
| PLOD1 | ZNF564    | -0.527900764 | 3.67E-14 |
| PLOD1 | RUNDC1    | -0.527853992 | 3.70E-14 |
| PLOD1 | ZNF91     | -0.527072687 | 4.09E-14 |
| PLOD1 | CCDC125   | -0.526596833 | 4.36E-14 |
| PLOD1 | DDC       | -0.526092619 | 4.65E-14 |
| PLOD1 | MTMR10    | -0.525764633 | 4.85E-14 |
| PLOD1 | C10orf108 | -0.525661928 | 4.92E-14 |
| PLOD1 | BEND7     | -0.525655379 | 4.92E-14 |
| PLOD1 | DGKE      | -0.52424809  | 5.90E-14 |
| PLOD1 | CA8       | -0.524104855 | 6.01E-14 |
| PLOD1 | ACACB     | -0.523600677 | 6.42E-14 |
| PLOD1 | CCDC64    | -0.522573071 | 7.33E-14 |
| PLOD1 | HIP1R     | -0.517110176 | 1.47E-13 |
| PLOD1 | EPHX2     | -0.516912039 | 1.50E-13 |
| PLOD1 | C2orf72   | -0.516289971 | 1.63E-13 |
| PLOD1 | ZSWIM5    | -0.5157223   | 1.75E-13 |
| PLOD1 | ZNF782    | -0.515396607 | 1.82E-13 |
| PLOD1 | NR3C2     | -0.51519868  | 1.87E-13 |
| PLOD1 | ANUBL1    | -0.51439753  | 2.06E-13 |
| PLOD1 | SECISBP2  | -0.514358643 | 2.07E-13 |
| PLOD1 | ZNF443    | -0.51375928  | 2.23E-13 |
| PLOD1 | LOC389332 | -0.511905009 | 2.81E-13 |
| PLOD1 | SLC25A20  | -0.511213608 | 3.07E-13 |
| PLOD1 | MOAP1     | -0.510613199 | 3.30E-13 |
| PLOD1 | ZNF33B    | -0.508490044 | 4.29E-13 |
| PLOD1 | EML5      | -0.506054699 | 5.77E-13 |
| PLOD1 | HNF1A     | -0.505993421 | 5.81E-13 |
| PLOD1 | ABCA5     | -0.50550761  | 6.17E-13 |
| PLOD1 | SUGT1L1   | -0.50395252  | 7.45E-13 |
| PLOD1 | KIAA1147  | -0.503144279 | 8.21E-13 |

|       |          |              |          |
|-------|----------|--------------|----------|
| PLOD1 | RAVER2   | -0.502322747 | 9.06E-13 |
| PLOD1 | KIAA0528 | -0.501946571 | 9.48E-13 |
| PLOD1 | ZFYVE28  | -0.501406206 | 1.01E-12 |
| PLOD1 | C9orf103 | -0.500004262 | 1.20E-12 |
| PLOD2 | REPIN1   | -0.641537908 | 5.02E-22 |
| PLOD2 | FBXW4    | -0.626225081 | 8.95E-21 |
| PLOD2 | C19orf73 | -0.612787124 | 9.85E-20 |
| PLOD2 | TYSND1   | -0.610235835 | 1.53E-19 |
| PLOD2 | PLEKHJ1  | -0.603226917 | 5.07E-19 |
| PLOD2 | AES      | -0.602856645 | 5.40E-19 |
| PLOD2 | SAFB     | -0.600903346 | 7.49E-19 |
| PLOD2 | ZFYVE27  | -0.593070125 | 2.73E-18 |
| PLOD2 | SLC48A1  | -0.591568953 | 3.48E-18 |
| PLOD2 | C19orf39 | -0.590004008 | 4.48E-18 |
| PLOD2 | TOR2A    | -0.589727883 | 4.68E-18 |
| PLOD2 | FUK      | -0.586252821 | 8.15E-18 |
| PLOD2 | SDHAF1   | -0.585040444 | 9.88E-18 |
| PLOD2 | ZFAND2B  | -0.583138986 | 1.33E-17 |
| PLOD2 | SURF6    | -0.580683464 | 1.96E-17 |
| PLOD2 | SF4      | -0.577709229 | 3.11E-17 |
| PLOD2 | ATG4D    | -0.573955632 | 5.52E-17 |
| PLOD2 | SMPD2    | -0.572798042 | 6.59E-17 |
| PLOD2 | CCDC94   | -0.572694834 | 6.69E-17 |
| PLOD2 | ALKBH7   | -0.572087185 | 7.34E-17 |
| PLOD2 | ASPSCR1  | -0.571905794 | 7.54E    |
| PLOD2 | PNPLA7   | -0.570133802 | 9.85E-17 |
| PLOD2 | CABC1    | -0.569781358 | 1.04E-16 |
| PLOD2 | SPRN     | -0.568822196 | 1.20E-16 |
| PLOD2 | SFXN4    | -0.568016581 | 1.35E-16 |
| PLOD2 | NSMCE4A  | -0.566650344 | 1.66E-16 |
| PLOD2 | C1orf56  | -0.566338324 | 1.74E-16 |
| PLOD2 | MRPS26   | -0.56451827  | 2.27E-16 |
| PLOD2 | GLYCTK   | -0.564351567 | 2.33E-16 |
| PLOD2 | MTG1     | -0.561153649 | 3.72E-16 |
| PLOD2 | JTB      | -0.56062552  | 4.02E-16 |
| PLOD2 | TIMM13   | -0.559761774 | 4.56E-16 |
| PLOD2 | ATP2A3   | -0.55951129  | 4.73E-16 |
| PLOD2 | PICK1    | -0.559104679 | 5.02E-16 |
| PLOD2 | COQ4     | -0.558700516 | 5.32E-16 |
| PLOD2 | MMAB     | -0.55782503  | 6.04E-16 |
| PLOD2 | HIP1R    | -0.557819447 | 6.04E-16 |
| PLOD2 | C22orf32 | -0.557509932 | 6.32E-16 |
| PLOD2 | CISD3    | -0.557471881 | 6.35E-16 |
| PLOD2 | RNF167   | -0.557220704 | 6.59E-16 |

|       |              |              |          |
|-------|--------------|--------------|----------|
| PLOD2 | PTPN18       | -0.557173423 | 6.63E-16 |
| PLOD2 | NDUFA7       | -0.557064978 | 6.73E-16 |
| PLOD2 | SNHG11       | -0.555775143 | 8.10E-16 |
| PLOD2 | C21orf2      | -0.555273687 | 8.71E-16 |
| PLOD2 | MRM1         | -0.554369852 | 9.91E-16 |
| PLOD2 | C19orf45     | -0.553682939 | 1.09E-15 |
| PLOD2 | MPND         | -0.553681597 | 1.09E-15 |
| PLOD2 | DDRKG1       | -0.55363773  | 1.10E-15 |
| PLOD2 | PTGES2       | -0.553352886 | 1.15E-15 |
| PLOD2 | NPDC1        | -0.553018158 | 1.20E-15 |
| PLOD2 | POLRMT       | -0.552147157 | 1.36E-15 |
| PLOD2 | TSEN54       | -0.551090553 | 1.58E-15 |
| PLOD2 | C20orf134    | -0.550832325 | 1.64E-15 |
| PLOD2 | BLOC1S1      | -0.549421033 | 1.99E-15 |
| PLOD2 | SNHG8        | -0.548591484 | 2.24E-15 |
| PLOD2 | FBXL15       | -0.548156117 | 2.38E-15 |
| PLOD2 | C7orf55      | -0.547301487 | 2.68E-15 |
| PLOD2 | CCDC22       | -0.546725051 | 2.91E-15 |
| PLOD2 | ZNF653       | -0.545615355 | 3.39E-15 |
| PLOD2 | LOC729991    | -0.545049137 | 3.67E-15 |
| PLOD2 | IRF2BP1      | -0.544429447 | 3.99E-15 |
| PLOD2 | MED16        | -0.544420708 | 4.00E-15 |
| PLOD2 | C7orf26      | -0.544029915 | 4.22E-15 |
| PLOD2 | FAM195A      | -0.544024819 | 4.22E-15 |
| PLOD2 | COG2         | -0.543419884 | 4.59E-15 |
| PLOD2 | UQCR11       | -0.542065091 | 5.53E-15 |
| PLOD2 | AIFM1        | -0.541752185 | 5.77E-15 |
| PLOD2 | NUDT16L1     | -0.541466432 | 6.00E-15 |
| PLOD2 | EPHX2        | -0.54132508  | 6.12E-15 |
| PLOD2 | LOC100128822 | -0.54112152  | 6.29E-15 |
| PLOD2 | SURF2        | -0.540477366 | 6.87E-15 |
| PLOD2 | PSTK         | -0.539741332 | 7.59E-15 |
| PLOD2 | C9orf7       | -0.537463211 | 1.03E-14 |
| PLOD2 | SURF1        | -0.537187807 | 1.07E-14 |
| PLOD2 | SLC2A8       | -0.536263847 | 1.21E-14 |
| PLOD2 | PRMT7        | -0.536108002 | 1.24E-14 |
| PLOD2 | ANKRD16      | -0.534985525 | 1.44E-14 |
| PLOD2 | MRPL4        | -0.534701064 | 1.50E-14 |
| PLOD2 | NECAB3       | -0.534527265 | 1.53E-14 |
| PLOD2 | GTPBP5       | -0.534477251 | 1.54E-14 |
| PLOD2 | CSRP2BP      | -0.534109306 | 1.62E-14 |
| PLOD2 | DUS3L        | -0.534096343 | 1.62E-14 |
| PLOD2 | DCI          | -0.533118264 | 1.85E-14 |
| PLOD2 | ERP29        | -0.532768658 | 1.94E-14 |

|       |           |              |          |
|-------|-----------|--------------|----------|
| PLOD2 | POLL      | -0.531992775 | 2.15E-14 |
| PLOD2 | ATP5D     | -0.53130922  | 2.35E-14 |
| PLOD2 | MRP63     | -0.531252012 | 2.37E-14 |
| PLOD2 | SLC35D2   | -0.53124522  | 2.37E-14 |
| PLOD2 | LSM7      | -0.531062677 | 2.43E-14 |
| PLOD2 | CNNM3     | -0.530238918 | 2.70E-14 |
| PLOD2 | FLJ39653  | -0.53019744  | 2.72E-14 |
| PLOD2 | C19orf25  | -0.530183966 | 2.72E-14 |
| PLOD2 | C6orf136  | -0.529881613 | 2.83E-14 |
| PLOD2 | SPPL2B    | -0.529657411 | 2.92E-14 |
| PLOD2 | COMTD1    | -0.528803486 | 3.27E-14 |
| PLOD2 | TMEM205   | -0.528450643 | 3.42E-14 |
| PLOD2 | LRWD1     | -0.528095843 | 3.58E-14 |
| PLOD2 | ZNF296    | -0.527712265 | 3.77E-14 |
| PLOD2 | NDUFS7    | -0.527262676 | 3.99E-14 |
| PLOD2 | RANBP3    | -0.526187933 | 4.59E-14 |
| PLOD2 | FOXP4     | -0.524923077 | 5.41E-14 |
| PLOD2 | VIPR1     | -0.524832206 | 5.48E-14 |
| PLOD2 | LRRC16B   | -0.52341475  | 6.57E-14 |
| PLOD2 | ZNF564    | -0.522627255 | 7.27E-14 |
| PLOD2 | ALKBH4    | -0.522592664 | 7.31E-14 |
| PLOD2 | SNAPC4    | -0.521857257 | 8.03E-14 |
| PLOD2 | MON1A     | -0.521701406 | 8.19E-14 |
| PLOD2 | SNHG7     | -0.521372979 | 8.54E-14 |
| PLOD2 | PWWP2B    | -0.521323353 | 8.60E-14 |
| PLOD2 | TTC15     | -0.519590539 | 1.07E-13 |
| PLOD2 | PMPCA     | -0.519532324 | 1.08E-13 |
| PLOD2 | ECSIT     | -0.51884953  | 1.18E-13 |
| PLOD2 | ILKAP     | -0.518795745 | 1.19E-13 |
| PLOD2 | IDI2      | -0.51874496  | 1.19E-13 |
| PLOD2 | LOC113230 | -0.51858239  | 1.22E-13 |
| PLOD2 | QTRT1     | -0.517996951 | 1.31E-13 |
| PLOD2 | KIAA0664  | -0.517538965 | 1.39E-13 |
| PLOD2 | XAB2      | -0.517449063 | 1.41E-13 |
| PLOD2 | C17orf59  | -0.516281099 | 1.63E-13 |
| PLOD2 | ENTPD6    | -0.515664548 | 1.76E-13 |
| PLOD2 | THAP7     | -0.514410074 | 2.06E-13 |
| PLOD2 | C9orf142  | -0.51423121  | 2.11E-13 |
| PLOD2 | FGFBP3    | -0.514170636 | 2.12E-13 |
| PLOD2 | LIAS      | -0.514168505 | 2.12E-13 |
| PLOD2 | SAPS2     | -0.514112029 | 2.14E-13 |
| PLOD2 | RPS10P7   | -0.514071987 | 2.15E-13 |
| PLOD2 | PEX11G    | -0.514039004 | 2.16E-13 |
| PLOD2 | VMAC      | -0.513313805 | 2.36E-13 |

|       |          |              |          |
|-------|----------|--------------|----------|
| PLOD2 | TPRN     | -0.512762732 | 2.53E-13 |
| PLOD2 | C14orf93 | -0.512320447 | 2.67E-13 |
| PLOD2 | PEX16    | -0.511619034 | 2.92E-13 |
| PLOD2 | LRSAM1   | -0.511588092 | 2.93E-13 |
| PLOD2 | MTIF3    | -0.511577147 | 2.93E-13 |
| PLOD2 | EIF3G    | -0.511447418 | 2.98E-13 |
| PLOD2 | NDOR1    | -0.510956279 | 3.16E-13 |
| PLOD2 | PELP1    | -0.510631224 | 3.29E-13 |
| PLOD2 | PCBD1    | -0.5102527   | 3.45E-13 |
| PLOD2 | NRL      | -0.510246372 | 3.45E-13 |
| PLOD2 | GLTSCR2  | -0.510031402 | 3.55E-13 |
| PLOD2 | C9orf86  | -0.510008968 | 3.56E-13 |
| PLOD2 | C21orf57 | -0.50892254  | 4.07E-13 |
| PLOD2 | NDUFB11  | -0.508616687 | 4.22E-13 |
| PLOD2 | OVCA2    | -0.507435409 | 4.88E-13 |
| PLOD2 | RASA4P   | -0.507101662 | 5.08E-13 |
| PLOD2 | ANAPC2   | -0.506621598 | 5.39E-13 |
| PLOD2 | TRMU     | -0.505885256 | 5.89E-13 |
| PLOD2 | PMVK     | -0.505679387 | 6.04E-13 |
| PLOD2 | HDHD3    | -0.505621677 | 6.08E-13 |
| PLOD2 | DOHH     | -0.504999577 | 6.56E-13 |
| PLOD2 | TACC2    | -0.504830287 | 6.70E-13 |
| PLOD2 | PHLDB3   | -0.504608296 | 6.88E-13 |
| PLOD2 | HNF1A    | -0.504519308 | 6.95E-13 |
| PLOD2 | ICA1     | -0.504288039 | 7.15E-13 |
| PLOD2 | C2orf79  | -0.503794828 | 7.59E-13 |
| PLOD2 | KIAA1543 | -0.503737026 | 7.64E-13 |
| PLOD2 | SLC25A38 | -0.503646638 | 7.73E-13 |
| PLOD2 | CLPP     | -0.503459664 | 7.90E-13 |
| PLOD2 | ILVBL    | -0.503148729 | 8.20E-13 |
| PLOD2 | ATP13A1  | -0.502867943 | 8.49E-13 |
| PLOD2 | MRPL54   | -0.502636931 | 8.73E-13 |
| PLOD2 | C9orf114 | -0.502587397 | 8.78E-13 |
| PLOD2 | DUS1L    | -0.502395096 | 8.98E-13 |
| PLOD2 | TSTD1    | -0.502283214 | 9.10E-13 |
| PLOD2 | PGPEP1   | -0.502076425 | 9.33E-13 |
| PLOD2 | ZNF672   | -0.501901565 | 9.53E-13 |
| PLOD2 | C1orf66  | -0.501865685 | 9.57E-13 |
| PLOD2 | ZNF688   | -0.501522437 | 9.97E-13 |
| PLOD2 | ZNF444   | -0.501469257 | 1.00E-12 |
| PLOD2 | APOA1BP  | -0.501293201 | 1.03E-12 |
| PLOD2 | DPM3     | -0.501168165 | 1.04E-12 |
| PLOD2 | NOL12    | -0.500573722 | 1.12E-12 |
| PLOD2 | ENDOG    | -0.500499933 | 1.13E-12 |

|       |          |              |          |
|-------|----------|--------------|----------|
| PLOD2 | NDUFS6   | -0.500142643 | 1.18E-12 |
| PLOD3 | ZNF543   | -0.500070869 | 1.19E-12 |
| PLOD3 | ABCC9    | -0.500865188 | 1.08E-12 |
| PLOD3 | REV1     | -0.501410539 | 1.01E-12 |
| PLOD3 | LONRF2   | -0.501545416 | 9.95E-13 |
| PLOD3 | ZNF570   | -0.501662373 | 9.81E-13 |
| PLOD3 | SCN4B    | -0.501695149 | 9.77E-13 |
| PLOD3 | GCNT4    | -0.502229285 | 9.16E-13 |
| PLOD3 | PRKRIR   | -0.502890859 | 8.46E-13 |
| PLOD3 | FAM13B   | -0.503353875 | 8.00E-13 |
| PLOD3 | KRT222   | -0.506017488 | 5.80E-13 |
| PLOD3 | ARHGEF6  | -0.506168861 | 5.69E-13 |
| PLOD3 | BCL2     | -0.506265453 | 5.63E-13 |
| PLOD3 | ZBTB44   | -0.509174193 | 3.94E-13 |
| PLOD3 | RORA     | -0.511552716 | 2.94E-13 |
| PLOD3 | NCOA1    | -0.511968408 | 2.79E-13 |
| PLOD3 | KIAA1370 | -0.513578386 | 2.29E-13 |
| PLOD3 | ZNF626   | -0.515023264 | 1.91E-13 |
| PLOD3 | ZNF671   | -0.515271208 | 1.85E-13 |
| PLOD3 | ZIK1     | -0.516359941 | 1.61E-13 |
| PLOD3 | ZNF383   | -0.518350291 | 1.25E-13 |
| PLOD3 | SASH1    | -0.519238413 | 1.12E-13 |
| PLOD3 | EPM2AIP1 | -0.520026294 | 1.01E-13 |
| PLOD3 | ZNF649   | -0.520375676 | 9.70E-14 |
| PLOD3 | LIFR     | -0.520799766 | 9.19E-14 |
| PLOD3 | LRRK2    | -0.526187069 | 4.59E-14 |
| PLOD3 | CYSLTR1  | -0.526437354 | 4.45E-14 |
| PLOD3 | ZNF551   | -0.532708136 | 1.95E-14 |
| PLOD3 | CENPC1   | -0.53358562  | 1.74E-14 |
| PLOD3 | LMO3     | -0.535506216 | 1.34E-14 |
| PLOD3 | TEK      | -0.53648312  | 1.18E-14 |
| PLOD3 | DNAJC27  | -0.536623547 | 1.16E-14 |
| PLOD3 | RRG      | -0.539213614 | 8.15E-15 |
| PLOD3 | ARHGEF3  | -0.539999259 | 7.33E-15 |
| PLOD3 | ASPA     | -0.546803781 | 2.88E-15 |
| PLOD3 | ZNF677   | -0.547774256 | 2.51E-15 |
| PLOD3 | ZNF615   | -0.551672478 | 1.45E-15 |
| PLOD3 | CRBN     | -0.555100488 | 8.93E-16 |
| PLOD3 | ATM      | -0.555866658 | 8.00E-16 |
| PLOD3 | ABCA8    | -0.560064298 | 4.36E-16 |
| PLOD3 | ZNF154   | -0.570550199 | 9.25E-17 |
| PLOD3 | ZNF167   | -0.582809534 | 1.40E-17 |
| PLOD3 | CEP68    | -0.595276047 | 1.90E-18 |

---

\*Only genes with correlation coefficient < - 0.5 are listed.



**Supplementary Table 3. significantly rich summary of GO annotation for PLADS positively related genes**

| <b>Description</b>                   | <b>Gene Count</b> | <b>pValue</b> | <b>Enriched Genes</b>                                                                                                                 |
|--------------------------------------|-------------------|---------------|---------------------------------------------------------------------------------------------------------------------------------------|
| <i>Biological Process</i>            |                   |               |                                                                                                                                       |
| mitotic cell cycle process           | 24                | 7.05E-11      | RHOC;ECT2;RCC1;E2F7;ANLN;KIF23;GPSM2;HMMR;KIF20A;NDC80;CENPF;MELK;CDC6;PRC1;EIF4G1;KIF18A;CENPE;CEP55;PLK4;NCAPH;BUB1;CCNJL;KIF14;PML |
| cell division                        | 20                | 4.49E-10      | RHOC;RALA;ECT2;RCC1;E2F7;ANLN;KIF23;GPSM2;KIF20A;NDC80;CENPF;CDC6;PRC1;NCAPG2;CENPE;CEP55;NCAPH;BUB1;FAM83D;KIF14                     |
| chromosome segregation               | 15                | 9.27E-10      | ECT2;RCC1;KIF23;NDC80;CENPF;CDC6;HJURP;PRC1;KIF18A;CENPE;CEP55;NCAPH;BUB1;FAM83D;KIF14                                                |
| mitotic cell cycle                   | 24                | 1.88E-09      | RHOC;ECT2;RCC1;E2F7;ANLN;KIF23;GPSM2;HMMR;KIF20A;NDC80;CENPF;MELK;CDC6;PRC1;EIF4G1;KIF18A;CENPE;CEP55;PLK4;NCAPH;BUB1;CCNJL;KIF14;PML |
| mitotic nuclear division             | 14                | 2.33E-09      | RCC1;ANLN;KIF23;NDC80;CENPF;CDC6;PRC1;KIF18A;CENPE;CEP55;NCAPH;BUB1;CCNJL;KIF14                                                       |
| mitotic sister chromatid segregation | 11                | 3.35E-09      | KIF23;NDC80;CENPF;CDC6;PRC1;KIF18A;CENPE;CEP55;NCAPH;BUB1;KIF14                                                                       |
| nuclear chromosome segregation       | 13                | 7.60E-09      | ECT2;KIF23;NDC80;CENPF;CDC6;PRC1;KIF18A;CENPE;CEP55;NCAPH;BUB1;FAM83D;KIF14                                                           |
| regulation of cell cycle process     | 20                | 7.90E-09      | ECT2;RCC1;E2F7;ANLN;KIF23;GPSM2;HMMR;KIF20A;NDC80;CENPF;CDC6;PRC1;EIF4G1;CENPE;PLK4;BUB1;CCNJL;FAM83D;KIF14;PML                       |
| protein hydroxylation                | 6                 | 1.36E-08      | PLOD1;PLOD2;PLOD3;P4HA1;P4HA2;EGLN3                                                                                                   |
| sister chromatid segregation         | 11                | 2.13E-08      | KIF23;NDC80;CENPF;CDC6;PRC1;KIF18A;CENPE;CEP55;NCAPH;BUB1;KIF14                                                                       |

**Cellular  
Component**

|                             |    |          |                                                                                                                                                                  |
|-----------------------------|----|----------|------------------------------------------------------------------------------------------------------------------------------------------------------------------|
| midbody                     | 13 | 6.64E-12 | RALA;ECT2;SLC2A1;ANLN;KIF23;HSP90B1;KIF20A;CENPF;PRC1;CENPE;CEP55;HSPA5;KIF14                                                                                    |
| cell division site part     | 7  | 4.80E-08 | RHOC;RALA;ECT2;ANLN;KIF20A;CEP55;PLK4                                                                                                                            |
| cell division site          | 7  | 8.16E-08 | RHOC;RALA;ECT2;ANLN;KIF20A;CEP55;PLK4                                                                                                                            |
| endoplasmic reticulum lumen | 12 | 8.27E-08 | PLOD3;RCN3;P4HA1;COL7A1;PLAUR;TMEM132A;P4HA2;CKAP4;HSP90B1;PDIA6;HSPA5;RCN1                                                                                      |
| spindle                     | 12 | 1.75E-07 | ECT2;KIF23;GPSM2;KIF20A;CKAP2L;CENPF;CDC6;PRC1;KIF18A;CENPE;FAM83D;KIF14                                                                                         |
| cleavage furrow             | 6  | 4.65E-07 | RHOC;RALA;ECT2;KIF20A;CEP55;PLK4                                                                                                                                 |
| cytoskeletal part           | 25 | 8.26E-07 | FSCN1;ZYX;ECT2;SLC2A1;ANLN;KIF23;TFAP2A;GPSM2;HMMR;TNNT1;C4orf47;KIF20A;CKAP2L;LASP1;NDC80;CENPF;ACTN4;CDC6;PRC1;KIF18A;CENPE;CEP55;PLK4;FAM83D;KIF14            |
| mitotic spindle             | 7  | 9.89E-07 | ECT2;KIF23;GPSM2;CKAP2L;KIF18A;CENPE;FAM83D                                                                                                                      |
| endoplasmic reticulum part  | 22 | 1.47E-06 | PLOD3;PLOD2;PLOD1;RCN3;P4HA1;AGTRAP;COL7A1;PLAUR;TMEM132A;OSTC;DDOST;P4HA2;SLC39A1;TFG;CKAP4;HSP90B1;PDIA6;STT3A;HSPA5;RCN1;FATE1;PML                            |
| endoplasmic reticulum       | 26 | 3.06E-06 | PLOD3;PLOD2;PLOD1;RCN3;P4HA1;AGTRAP;COL7A1;PLAUR;TMEM132A;FKBP9;ULBP2;OSTC;DDOST;SLC39A13;P4HA2;SLC39A1;TFG;CKAP4;HSP90B1;ULBP1;PDIA6;STT3A;HSPA5;RCN1;FATE1;PML |

**Molecular  
Function**

|                         |   |          |                                                      |
|-------------------------|---|----------|------------------------------------------------------|
| L-ascorbic acid binding | 6 | 1.84E-09 | PLOD3;PLOD2;PLOD1;P4HA1;P4HA2;EGLN3                  |
| oxidoreductase activity | 6 | 4.45E-07 | PLOD3;PLOD2;PLOD1;P4HA1;P4HA2;EGLN3                  |
| carboxylic acid binding | 9 | 4.61E-06 | PLOD3;PLOD2;PLOD1;P4HA1;AGRN;P4HA2;EGLN3;HMMR;HAPLN1 |
| monosaccharide binding  | 6 | 6.70E-06 | PLOD3;PLOD2;PLOD1;P4HA1;P4HA2;EGLN3                  |

|                                                                        |    |             |                                                                           |
|------------------------------------------------------------------------|----|-------------|---------------------------------------------------------------------------|
| organic acid binding                                                   | 9  | 7.11E-06    | PLOD3;PLOD2;PLOD1;P4HA1;AGRN;P4HA2;EGLN3;HMMR;HAPLN1                      |
| dolichyl-diphosphooligosaccharide-protein glycosyltransferase activity | 3  | 1.93E-05    | OSTC;DDOST;STT3A                                                          |
| dioxygenase activity                                                   | 6  | 2.36E-05    | PLOD3;PLOD2;PLOD1;P4HA1;P4HA2;EGLN3                                       |
| oligosaccharyl transferase activity                                    | 3  | 2.74E-05    | OSTC;DDOST;STT3A                                                          |
| peptidyl-proline 4-dioxygenase activity                                | 3  | 3.75E-05    | P4HA1;P4HA2;EGLN3                                                         |
| cell adhesion molecule binding                                         | 12 | 4.26E-05    | ENO1;ITGB5;FSCN1;ARHGAP1;TBC1D2;DIAPH3;ANLN;ITGA3;PLIN3;LASP1;ACTN4;HSPA5 |
| <b>KEGG</b>                                                            |    |             |                                                                           |
| <b>Pathway</b>                                                         |    |             |                                                                           |
| ECM-receptor interaction                                               | 5  | 2.30E-04    | ITGB5;AGRN;LAMB3;HMMR;ITGA3                                               |
| Protein processing in endoplasmic reticulum                            | 6  | 8.67E-04    | DDOST;CKAP4;HSP90B1;PDIA6;STT3A;HSPA5                                     |
| Focal adhesion                                                         | 6  | 0.002271064 | ITGB5;ZYX;ACTB;LAMB3;ITGA3;ACTN4                                          |
| HIF-1 signaling pathway                                                | 4  | 0.004778962 | ENO1;PGK1;EGLN3;SLC2A1                                                    |
| Lysine degradation                                                     | 3  | 0.007590955 | PLOD3;PLOD2;PLOD1                                                         |

|                                                                 |   |                 |                                               |
|-----------------------------------------------------------------|---|-----------------|-----------------------------------------------|
| Arrhythmogenic<br>right ventricular<br>cardiomyopathy<br>(ARVC) | 3 | 0.013085<br>039 | ITGB5;ACTB;ITGA3                              |
| Regulation of<br>actin<br>cytoskeleton                          | 5 | 0.014959<br>261 | ITGB5;ACTB;DIAPH3;ITGA3;ACTN4                 |
| Hypertrophic<br>cardiomyopathy<br>(HCM)                         | 3 | 0.019126<br>69  | ITGB5;ACTB;ITGA3                              |
| Dilated<br>cardiomyopathy<br>(DCM)                              | 3 | 0.023653<br>108 | ITGB5;ACTB;ITGA3                              |
| Pathways in<br>cancer                                           | 8 | 0.025233<br>077 | RALA;EGLN3;TFG;SLC2A1;LAMB3;HSP90B1;ITGA3;PML |

**Supplementary Table 4. significantly rich summary of GO annotation for PLADS negatively related gene related networks**

| <b>Description</b>                          | <b>Gene<br/>Count</b> | <b>Adjusted<br/>P-Value</b> | <b>Enriched Genes</b>                                              |
|---------------------------------------------|-----------------------|-----------------------------|--------------------------------------------------------------------|
| <b>Biological<br/>Process</b>               |                       |                             |                                                                    |
| cellular amino<br>acid catabolic<br>process | 9                     | 1.37242E-06                 | AMT/AUH/IVD/OTC/PAH/ALDH5A1/ACAD8<br>/GLS2/ASRGL1                  |
| alpha-amino acid<br>metabolic<br>process    | 11                    | 3.66603E-06                 | AMT/AUH/IVD/OTC/PAH/ALDH5A1/ACAD8<br>/GLS2/SEPSECS/ASRGL1/MTHFD2L  |
| alpha-amino acid<br>catabolic process       | 8                     | 3.78617E-06                 | AMT/AUH/IVD/OTC/PAH/ACAD8/GLS2/ASR<br>GL1                          |
| organic acid<br>catabolic process           | 12                    | 4.87553E-06                 | ACACB/AMT/AUH/IVD/OTC/PAH/ALDH5A1<br>/ACAD8/GLS2/ASRGL1/MCEE/NUDT7 |
| carboxylic acid<br>catabolic process        | 12                    | 4.87553E-06                 | ACACB/AMT/AUH/IVD/OTC/PAH/ALDH5A1<br>/ACAD8/GLS2/ASRGL1/MCEE/NUDT7 |

|                                                       |    |             |                                                                        |
|-------------------------------------------------------|----|-------------|------------------------------------------------------------------------|
| cellular amino acid metabolic process                 | 12 | 8.17026E-05 | AMT/AUH/IVD/OTC/PAH/ALDH5A1/ACAD8/GLS2/SEPSECS/QRSL1/ASRGL1/MTHFD2L    |
| fatty acid metabolic process                          | 12 | 0.000125275 | ACACB/AUH/CYP2C8/EPHX2/IVD/ACSM3/ALDH5A1/ACSL6/MCEE/NUDT7/ZADH2/CYP4V2 |
| small molecule catabolic process                      | 13 | 0.000131344 | ACACB/AMT/AUH/IVD/OTC/PAH/ALDH5A1/ACAD8/GLS2/ASRGL1/CDADC1/MCEE/NUDT7  |
| positive regulation of ion transport                  | 10 | 0.000140654 | ATP1B2/CACNB2/CAPN3/CHRN2/KCNJ11/MLLT6/NPPA/RAMP3/ATP8A1/AMIGO1        |
| monocarboxylic acid catabolic process                 | 7  | 0.000148807 | ACACB/AUH/IVD/ALDH5A1/ASRGL1/MCEE/NUDT7                                |
| positive regulation of cation transmembrane transport | 7  | 0.000254518 | ATP1B2/CACNB2/CAPN3/KCNJ11/NPPA/RAMP3/AMIGO1                           |
| regulation of skeletal muscle adaptation              | 3  | 0.000391621 | CAMK2B/GTF2IRD2/GTF2IRD2B                                              |
| positive regulation of ion transmembrane transport    | 7  | 0.000413753 | ATP1B2/CACNB2/CAPN3/KCNJ11/NPPA/RAMP3/AMIGO1                           |
| branched-chain amino acid metabolic process           | 3  | 0.000746814 | AUH/IVD/ACAD8                                                          |
| branched-chain amino acid catabolic process           | 3  | 0.000746814 | AUH/IVD/ACAD8                                                          |

**Cellular Component**

|                                                                  |    |             |                                                                                                                                                                  |
|------------------------------------------------------------------|----|-------------|------------------------------------------------------------------------------------------------------------------------------------------------------------------|
| Rough endoplasmic reticulum membrane                             | 3  | 0.002471542 | PLOD3, PLOD2, PLOD1                                                                                                                                              |
| mitochondrial matrix                                             | 10 | 0.00439838  | ACAD8, MCEE, ALDH5A1, AUH, ACSM3, GLS2, IVD, MTHFD2L, AMT, OTC                                                                                                   |
| neuronal cell body membrane                                      | 3  | 0.012680811 | SLC4A8, AMIGO1, FLRT1                                                                                                                                            |
| intracellular                                                    | 22 | 0.016969865 | ZNF540, ZNF782, RAMP3, ZNF44, MYRIP, CLU, ZNF33B, ZNF33A, RDH12, RAB37, ZNF506, SEC14L5, ZNF30, DCX, TRIM68, CAPN3, RHOU, ZNF557, ZNF589, ZNF763, ZNF620, ZNF596 |
| myofibril                                                        | 3  | 0.029431117 | TMOD1, ANKRD23, CAPN3                                                                                                                                            |
| <b>Molecular Function</b>                                        |    |             |                                                                                                                                                                  |
| alkali metal ion binding                                         | 3  | 0.000429708 | ATP1A2/CAPN3/KCNJ11                                                                                                                                              |
| ATPase activity, coupled to transmembrane movement of substances | 6  | 0.000802459 | ABCC6/ATP1A2/ATP1B2/ATP8A1/ABCA5/ABCA11P                                                                                                                         |
| ATPase activity, coupled to movement of substances               | 6  | 0.000802459 | ABCC6/ATP1A2/ATP1B2/ATP8A1/ABCA5/ABCA11P                                                                                                                         |
| P-P-bond-hydrolysis-driven transmembrane transporter activity    | 6  | 0.001138934 | ABCC6/ATP1A2/ATP1B2/ATP8A1/ABCA5/ABCA11P                                                                                                                         |

|                                                                       |    |             |                                                                                          |
|-----------------------------------------------------------------------|----|-------------|------------------------------------------------------------------------------------------|
| hydrolase activity, acting on carbon-nitrogen (but not peptide) bonds | 6  | 0.001138934 | ADARB2/GLS2/QRSL1/ASRGL1/CDADC1/MTHFD2L                                                  |
| primary active transmembrane transporter activity                     | 6  | 0.001237839 | ABCC6/ATP1A2/ATP1B2/ATP8A1/ABCA5/ABCA11P                                                 |
| <b>KEGG Pathway</b>                                                   |    |             |                                                                                          |
| Herpes simplex virus 1 infection                                      | 13 | 0.00067523  | ZNF33A/ZNF33B/ZNF589/ZNF44/ZNF557/ZNF30/ZNF799/ZNF782/ZNF540/ZNF596/ZNF620/ZNF763/ZNF506 |
| Valine, leucine and isoleucine degradation                            | 4  | 0.001029969 | AUH/IVD/ACAD8/MCEE                                                                       |
| Proximal tubule bicarbonate reclamation                               | 3  | 0.00123878  | ATP1A2/ATP1B2/GLS2                                                                       |
| Aldosterone synthesis and secretion                                   | 5  | 0.002221761 | ATP1A2/ATP1B2/CAMK2B/KCNK3/NPPA                                                          |
